# Supplementary material for: Applications of a working framework for the measurement of representative learning design in Australian football
Source: PubMed Central journal article supplement (PMC7703947; doi:10.1371/journal.pone.0242336), 2020-11-30

# PLOS ONE

## Applications of a working framework for the measurement of representative learning design in Australian football --Manuscript Draft--

|                                                                                                                                                                                                                                                                                          |                                                                                                                                                                                                                                                                                                                                                                                                                                                                                                                                                                                                                                                                                                                                                                                                                                                                                                                                                                                                                                                                                                                                                                                                                                                                                                                                                                                                                                                                                                                           |
|------------------------------------------------------------------------------------------------------------------------------------------------------------------------------------------------------------------------------------------------------------------------------------------|---------------------------------------------------------------------------------------------------------------------------------------------------------------------------------------------------------------------------------------------------------------------------------------------------------------------------------------------------------------------------------------------------------------------------------------------------------------------------------------------------------------------------------------------------------------------------------------------------------------------------------------------------------------------------------------------------------------------------------------------------------------------------------------------------------------------------------------------------------------------------------------------------------------------------------------------------------------------------------------------------------------------------------------------------------------------------------------------------------------------------------------------------------------------------------------------------------------------------------------------------------------------------------------------------------------------------------------------------------------------------------------------------------------------------------------------------------------------------------------------------------------------------|
| <b>Manuscript Number:</b>                                                                                                                                                                                                                                                                | PONE-D-20-14878                                                                                                                                                                                                                                                                                                                                                                                                                                                                                                                                                                                                                                                                                                                                                                                                                                                                                                                                                                                                                                                                                                                                                                                                                                                                                                                                                                                                                                                                                                           |
| <b>Article Type:</b>                                                                                                                                                                                                                                                                     | Research Article                                                                                                                                                                                                                                                                                                                                                                                                                                                                                                                                                                                                                                                                                                                                                                                                                                                                                                                                                                                                                                                                                                                                                                                                                                                                                                                                                                                                                                                                                                          |
| <b>Full Title:</b>                                                                                                                                                                                                                                                                       | Applications of a working framework for the measurement of representative learning design in Australian football                                                                                                                                                                                                                                                                                                                                                                                                                                                                                                                                                                                                                                                                                                                                                                                                                                                                                                                                                                                                                                                                                                                                                                                                                                                                                                                                                                                                          |
| <b>Short Title:</b>                                                                                                                                                                                                                                                                      | A working framework for the measurement of representative learning designs                                                                                                                                                                                                                                                                                                                                                                                                                                                                                                                                                                                                                                                                                                                                                                                                                                                                                                                                                                                                                                                                                                                                                                                                                                                                                                                                                                                                                                                |
| <b>Corresponding Author:</b>                                                                                                                                                                                                                                                             | Peter R Browne<br>Victoria University<br>Footscray, AUSTRALIA                                                                                                                                                                                                                                                                                                                                                                                                                                                                                                                                                                                                                                                                                                                                                                                                                                                                                                                                                                                                                                                                                                                                                                                                                                                                                                                                                                                                                                                             |
| <b>Keywords:</b>                                                                                                                                                                                                                                                                         | association rules; performance analysis; training design; ecological dynamics                                                                                                                                                                                                                                                                                                                                                                                                                                                                                                                                                                                                                                                                                                                                                                                                                                                                                                                                                                                                                                                                                                                                                                                                                                                                                                                                                                                                                                             |
| <b>Abstract:</b>                                                                                                                                                                                                                                                                         | <p>Representative learning design proposes that a training task should faithfully represent informational constraints present within a competitive environment. To assess the level of representativeness of a training task, the frequency and interaction of constraints should be measured. This study compared constraint interactions and their frequencies in training (match simulations and small sided games) with competition environments in elite Australian football. The extent to which constraints influenced disposal type and effectiveness across environments was also determined. Constraints relating to pressure and time in possession were assessed, alongside disposal effectiveness, through the use of association rules. These rules were then expanded upon to determine how a disposal influenced the effectiveness of the following disposal. Disposal type differed between training and competition environments, with match simulations yielding greater representativeness compared to small sided games. The subsequent disposal was generally more effective in small sided games compared to the match simulations and competition matches. These findings offer insight into the measurement of representative learning designs through the exploration of constraint interactions. The analytical techniques utilised may assist other practitioners with the design and monitoring of training tasks intended to facilitate skill transfer from preparation to competition.</p> |
| <b>Order of Authors:</b>                                                                                                                                                                                                                                                                 | Peter R Browne<br>Carl T Woods<br>Alice J Sweeting<br>Sam Robertson                                                                                                                                                                                                                                                                                                                                                                                                                                                                                                                                                                                                                                                                                                                                                                                                                                                                                                                                                                                                                                                                                                                                                                                                                                                                                                                                                                                                                                                       |
| <b>Additional Information:</b>                                                                                                                                                                                                                                                           |                                                                                                                                                                                                                                                                                                                                                                                                                                                                                                                                                                                                                                                                                                                                                                                                                                                                                                                                                                                                                                                                                                                                                                                                                                                                                                                                                                                                                                                                                                                           |
| <b>Question</b>                                                                                                                                                                                                                                                                          | <b>Response</b>                                                                                                                                                                                                                                                                                                                                                                                                                                                                                                                                                                                                                                                                                                                                                                                                                                                                                                                                                                                                                                                                                                                                                                                                                                                                                                                                                                                                                                                                                                           |
| <b>Financial Disclosure</b>                                                                                                                                                                                                                                                              | The author(s) received no specific funding for this work.                                                                                                                                                                                                                                                                                                                                                                                                                                                                                                                                                                                                                                                                                                                                                                                                                                                                                                                                                                                                                                                                                                                                                                                                                                                                                                                                                                                                                                                                 |
| Enter a financial disclosure statement that describes the sources of funding for the work included in this submission. Review the <a href="#">submission guidelines</a> for detailed requirements. View published research articles from <a href="#">PLOS ONE</a> for specific examples. |                                                                                                                                                                                                                                                                                                                                                                                                                                                                                                                                                                                                                                                                                                                                                                                                                                                                                                                                                                                                                                                                                                                                                                                                                                                                                                                                                                                                                                                                                                                           |
| This statement is required for submission and <b>will appear in the published article</b> if the submission is accepted. Please make                                                                                                                                                     |                                                                                                                                                                                                                                                                                                                                                                                                                                                                                                                                                                                                                                                                                                                                                                                                                                                                                                                                                                                                                                                                                                                                                                                                                                                                                                                                                                                                                                                                                                                           |

sure it is accurate.

#### Unfunded studies

Enter: *The author(s) received no specific funding for this work.*

#### Funded studies

Enter a statement with the following details:

- Initials of the authors who received each award
- Grant numbers awarded to each author
- The full name of each funder
- URL of each funder website
- Did the sponsors or funders play any role in the study design, data collection and analysis, decision to publish, or preparation of the manuscript?
- **NO** - Include this sentence at the end of your statement: *The funders had no role in study design, data collection and analysis, decision to publish, or preparation of the manuscript.*
- **YES** - Specify the role(s) played.

\* typeset

#### Competing Interests

Use the instructions below to enter a competing interest statement for this submission. On behalf of all authors, disclose any [competing interests](#) that could be perceived to bias this work—acknowledging all financial support and any other relevant financial or non-financial competing interests.

This statement **will appear in the published article** if the submission is accepted. Please make sure it is accurate. View published research articles from [PLOS ONE](#) for specific examples.

The authors have declared that no competing interests exist.

**NO authors have competing interests**

Enter: *The authors have declared that no competing interests exist.*

**Authors with competing interests**

Enter competing interest details beginning with this statement:

*I have read the journal's policy and the authors of this manuscript have the following competing interests: [insert competing interests here]*

\* typeset

**Ethics Statement**

Enter an ethics statement for this submission. This statement is required if the study involved:

- Human participants
- Human specimens or tissue
- Vertebrate animals or cephalopods
- Vertebrate embryos or tissues
- Field research

Write "N/A" if the submission does not require an ethics statement.

General guidance is provided below. Consult the [submission guidelines](#) for detailed instructions. **Make sure that all information entered here is included in the Methods section of the manuscript.**

Ethical approval to undertake the study was granted by the Victoria University Ethics Committee (HRE18 – 022).

Data was analysed anonymously.

**Format for specific study types**

**Human Subject Research (involving human participants and/or tissue)**

- Give the name of the institutional review board or ethics committee that approved the study
- Include the approval number and/or a statement indicating approval of this research
- Indicate the form of consent obtained (written/oral) or the reason that consent was not obtained (e.g. the data were analyzed anonymously)

**Animal Research (involving vertebrate animals, embryos or tissues)**

- Provide the name of the Institutional Animal Care and Use Committee (IACUC) or other relevant ethics board that reviewed the study protocol, and indicate whether they approved this research or granted a formal waiver of ethical approval
- Include an approval number if one was obtained
- If the study involved *non-human primates*, add *additional details* about animal welfare and steps taken to ameliorate suffering
- If anesthesia, euthanasia, or any kind of animal sacrifice is part of the study, include briefly which substances and/or methods were applied

**Field Research**

Include the following details if this study involves the collection of plant, animal, or other materials from a natural setting:

- Field permit number
- Name of the institution or relevant body that granted permission

**Data Availability**

Authors are required to make all data underlying the findings described fully available, without restriction, and from the time of publication. PLOS allows rare exceptions to address legal and ethical concerns. See the [PLOS Data Policy](#) and [FAQ](#) for detailed information.

Yes - all data are fully available without restriction

A Data Availability Statement describing where the data can be found is required at submission. Your answers to this question constitute the Data Availability Statement and **will be published in the article**, if accepted.

**Important:** Stating 'data available on request from the author' is not sufficient. If your data are only available upon request, select 'No' for the first question and explain your exceptional situation in the text box.

Do the authors confirm that all data underlying the findings described in their manuscript are fully available without restriction?

**Describe where the data may be found in full sentences. If you are copying our sample text, replace any instances of XXX with the appropriate details.**

- If the data are **held or will be held in a public repository**, include URLs, accession numbers or DOIs. If this information will only be available after acceptance, indicate this by ticking the box below. For example: *All XXX files are available from the XXX database (accession number(s) XXX, XXX).*
- If the data are all contained **within the manuscript and/or Supporting Information files**, enter the following: *All relevant data are within the manuscript and its Supporting Information files.*
- If neither of these applies but you are able to provide **details of access elsewhere**, with or without limitations, please do so. For example:

*Data cannot be shared publicly because of [XXX]. Data are available from the XXX Institutional Data Access / Ethics Committee (contact via XXX) for researchers who meet the criteria for access to confidential data.*

*The data underlying the results presented in the study are available from (include the name of the third party*

All relevant data to reproduce the study are available within the manuscript in the Supporting Information files. We have had to de-identify the data and the drill names.

*and contact information or URL).*

- This text is appropriate if the data are owned by a third party and authors do not have permission to share the data.

\* typeset

Additional data availability information:

1 Applications of a working framework for the measurement of  
2 representative learning design in Australian football

3

4

5

Research Type: Original Investigation

6

7

Short Title: A working framework for the measurement of representative learning designs

8

9

Peter R Browne<sup>1,2</sup>, Carl T Woods<sup>1</sup>, Alice J Sweeting<sup>1,2</sup>, Sam Robertson<sup>1,2</sup>

10

11

<sup>1</sup> Institute for Health and Sport (iHeS), Victoria University, Footscray, Victoria, Australia

12

<sup>2</sup> Western Bulldogs, Footscray, Victoria

13

14

15

Corresponding author: Peter Browne - Institute for Health and Sport (iHeS), Victoria

16

University, Melbourne, Australia

17

Tel: +61 436 009 480

18

Email: [peter.browne2@live.vu.edu.au](mailto:peter.browne2@live.vu.edu.au)

19

20

Total word count: 3263

21

Abstract word count: 192

22

Number of tables: 3

23

Number of figures: 3

24

25 **Abstract**

26 Representative learning design proposes that a training task should faithfully represent  
27 informational constraints present within a competitive environment. To assess the level of  
28 representativeness of a training task, the frequency and interaction of constraints should be  
29 measured. This study compared constraint interactions and their frequencies in training (match  
30 simulations and small sided games) with competition environments in elite Australian football.  
31 The extent to which constraints influenced disposal type and effectiveness across environments  
32 was also determined. Constraints relating to pressure and time in possession were assessed,  
33 alongside disposal effectiveness, through the use of association rules. These rules were then  
34 expanded upon to determine how a disposal influenced the effectiveness of the following  
35 disposal. Disposal type differed between training and competition environments, with match  
36 simulations yielding greater representativeness compared to small sided games. The  
37 subsequent disposal was generally more effective in small sided games compared to the match  
38 simulations and competition matches. These findings offer insight into the measurement of  
39 representative learning designs through the exploration of constraint interactions. The  
40 analytical techniques utilised may assist other practitioners with the design and monitoring of  
41 training tasks intended to facilitate skill transfer from preparation to competition.

42

43 **Key words:** association rules, performance analysis, training design, ecological dynamics



## 44 **Introduction**

45 A predominant challenge facing sports practitioners is the design and implementation of  
46 training environments that represent competition. This approach to training design has been  
47 referred to as representative learning design (RLD) (1). Theoretically, RLD advocates for  
48 training to consist of constraints (or information sources) that are experienced within  
49 competition to maximise the transfer of skill from training to competition(1, 2). Constraints are  
50 categorised into: Individual (e.g., physical attributes and emotions), Task (e.g., rules and  
51 ground dimensions) and Environmental (e.g., weather and gravity) classes (3, 4). To assist with  
52 the design of representative training tasks, practitioners typically record the constraints of a  
53 competitive environment to ensure such constraints are designed into training (5). However,  
54 understanding how these constraints interact to influence a performer's actions and behaviours  
55 is an ongoing challenge for practitioners, given the non-linearity and dynamicity of sports  
56 performance (6).

57 An important feature of a constraints-led approach to training design is the  
58 understanding that constraints do not exist in isolation. Rather, they dynamically interact with  
59 one another, often in a continuous manner (4, 7). However, the measurement of the dynamic  
60 interaction of constraints has been somewhat neglected within the literature (6). Whilst  
61 constraints can be collected from training and competition environments, such approaches  
62 often overlook constraint interaction and are unable to capture then analyse the complexity of  
63 systems in full (8, 9). Recently, the interaction among constraints was examined via machine  
64 learning techniques in Australian football (AF) (6, 10). The application of a rules-based  
65 approach enables the complexity of RLD to be measured, through the identification of key  
66 constraint interactions based on both their frequency and their displayed influence on  
67 behaviours. An informed RLD is vital for practitioners as how constraints are enacted in  
68 training has been suggested to skill development and learning transfer (1, 11-13).

69           Within many team sports, including AF, small sided games (SSGs) are used as a  
70 frequent training modality due to their perceived representativeness of competition matches  
71 and ease of constraint manipulation (14, 15). Specifically, SSGs can be used to simulate sub-  
72 phases of competition, whilst to some extent, preserve the complex interactions between an  
73 athlete and their environment (16-18). Match simulations are another common training strategy  
74 within preparation for performance models in team sports, as they afford practitioners with a  
75 practice landscape that can simulate scenarios commonly encountered within competition.  
76 **Match simulations and SSGs are different types of training modalities and thus, the frequency**  
77 **and interaction of constraints may differ.**

78           The primary aim of this study was to compare constraint interactions and their  
79 frequencies, between match simulations, SSGs, and competition matches in AF. Secondly, the  
80 study aimed to determine the extent to which they influenced disposal type and effectiveness.  
81 **Thirdly, this study sought to understand the sequential nature of disposals and whether disposal**  
82 **sequences are dependent upon the preceding disposals.** By addressing these aims, this study  
83 sought to progress the methodology of measurement for RLD in sporting environments.

84

## 85 **Methodology**

86 Data was collected from 2018 official matches and 2019 training sessions from one Australian  
87 Football League (AFL) club. All 2018 regular season matches were included ( $n = 22$ , disposal  
88 instances = 3,478). Specific tasks from training sessions were included, consisting of match  
89 simulations ( $n = 13$ , disposal instances = 1,298) and **SSGs** ( $n = 24$ , disposal instances = 2,677).  
90 Ethical approval was granted by the University Human Research Ethics Committee  
91 (application number: HRE18-022).

92           Match footage was provided by Champion Data (Melbourne, Australia, Pty. Ltd.),  
93 whilst training tasks were filmed by club staff, from the same perspective as the match footage

94 (behind the goals and side view). All footage was then subjected to notational analysis via  
 95 SportsCode (version 11.2.3, Hudl). Constraints collected included: disposal type, pressure,  
 96 time in possession and disposal effectiveness (Table 1). These constraint types were based  
 97 upon similar literature (6, 10, 19). The nature of the options for each constraint sampled limited  
 98 bias in the rule-based approach, as all constraints had the same number of sub-categories (Table  
 99 1).

100

101 **Table 1. Description of constraints sampled, their sub-category, and definition**

| Constraint sampled     | Sub-category | Definition                                                                                                                                                      |
|------------------------|--------------|-----------------------------------------------------------------------------------------------------------------------------------------------------------------|
| Disposal Type          | Kick         | Disposal of the football with any part of the leg below the knee                                                                                                |
|                        | Handball     | Disposal of the football by hitting it with the clenched fist of one hand, while holding the football with the other                                            |
| Pressure               | Pressure     | Opposition player defending the ball carrier from any direction                                                                                                 |
|                        | No Pressure  |                                                                                                                                                                 |
| Time in Possession     | > 2 sec      | Time with ball in possession from receiving the football to disposing of it                                                                                     |
|                        | < 2 sec      |                                                                                                                                                                 |
| Disposal Effectiveness | Effective    | An effective kick is of more than 40 m to a 50/50 contest or better for the team in possession, or a kick of less than 40 m that results in retained possession |
|                        | Ineffective  |                                                                                                                                                                 |

102

103 All analyses were undertaken in the R computing environment (version 3.6.1, Vienna,  
 104 Austria) and included a three-stage process. All code for the following analyses are available  
 105 on Github ([www.github.com/PeterRBrowne](http://www.github.com/PeterRBrowne)). First, association rules were generated for all  
 106 disposals for match simulation and SSGs and competitive matches. Association rules are a type  
 107 of machine learning algorithm which can identify underlying and frequent non-linear patterns  
 108 in a large dataset (20). The ‘*Arules*’ package was used to apply the Apriori algorithm (21) and  
 109 to measure the association between multiple constraints on disposal efficiency. Minimum  
 110 support and confidence levels were set at 0.0002 to allow for all possible rules to be generated.  
 111 The minimum number of variables was set at four to ensure that each coded constraint was

112 included. The association rules were arbitrarily assigned an alphabetical identity (ID), being  
113 then compared by levels of support and confidence (22).

114 The frequency a Rule ID was then followed by a subsequent Rule ID was then  
115 calculated with the *'tidyr'* and *'dplyr'* packages (23, 24). The difference between training and  
116 competition frequencies was then calculated. The observed frequency of a third disposal being  
117 effective was calculated. This was visualised using a lattice plot, with colour hues to  
118 differentiate the observed frequency of an effective disposal. The level of observed frequency  
119 of an effective disposal was calculated as the weighted average of the confidence of a Rule ID  
120 and the frequency with which three sequential rules occurred.

121

## 122 **Results**

123 The association rules with assigned alphabetical ID are presented in Table 2, and the  
124 differences in rule frequency (A) and confidence levels (B) are displayed in Fig 1. The lowest  
125 support across all three environments was Rule E (0.012), and the largest was Rule G (0.316),  
126 with both occurring in the competition environment (Fig 1A). The support levels for match  
127 simulation rules were generally more representative of a competitive match, relative to SSGs,  
128 based on the constraints measured. Rule G, a pressured handball performed within 2s, showed  
129 the largest difference between competition matches and the SSGs (Fig 1A). Levels of support  
130 also varied between environments, with Rule G being the most frequent in matches and match  
131 simulations, whilst Rule D was the most frequent in SSGs (Fig 1A). With the exception of Rule  
132 C, rules corresponding to 'kicks' yielded lower confidence in competition matches relative to  
133 SSGs, but higher confidence relative to match simulations (Fig 1B). For rules relating to  
134 'handballs', the confidence was highest in competition matches relative to the training tasks  
135 (Fig 1B).

136

137 **Table 2.** Breakdown of each possible association rule and its associated alphabetical ID

| ID | Type     | Pressure    | Time in Possession (seconds) |
|----|----------|-------------|------------------------------|
| A  | Kick     | No Pressure | <2                           |
| B  | Kick     | No Pressure | >2                           |
| C  | Kick     | Pressure    | >2                           |
| D  | Kick     | Pressure    | <2                           |
| E  | Handball | No Pressure | >2                           |
| F  | Handball | No Pressure | <2                           |
| G  | Handball | Pressure    | <2                           |
| H  | Handball | Pressure    | >2                           |

138

139

\*\*\*\* INSERT FIGURE 1 ABOUT HERE \*\*\*\*

140

141 The differences between sequential Rule IDs were calculated between training and competition  
 142 environments (Table 3). Positive values reflect a greater frequency of occurrence within  
 143 competition matches, whereas negative values indicate greater frequency of occurrence in the  
 144 training environment. Match simulations were more similar to competition matches, relative  
 145 to SSGs in levels of support (Table 3A) and confidence (Table 3B). Disposal sequence differed  
 146 more between competition matches and SSGs, with eight sequences having a greater than a  
 147  $\pm 20$  % difference between environments (Table 3B). Whilst for similar disposal sequences  
 148 between training and competition environments, both match simulation and SSGs were similar  
 149 with twelve and eleven sequences having less than  $\pm 1$  % difference respectively (Table 3).

150

151 **Table 3.** Difference between frequency of second pass following first pass for competition  
 152 matches and match simulations (A), and competition matches and SSGs (B). Values are  
 153 expressed as percentage differences (%).  
 154

| A          |   | Second Pass |     |    |   |    |    |    |    |
|------------|---|-------------|-----|----|---|----|----|----|----|
|            |   | A           | B   | C  | D | E  | F  | G  | H  |
| First Pass | A | -2          | 9   | 3  | 2 | 1  | -6 | -6 | -2 |
|            | B | 4           | -18 | 2  | 9 | -3 | -3 | 11 | -2 |
|            | C | 0           | 7   | -9 | 5 | 0  | -2 | 1  | -2 |

|  |   |    |     |     |    |    |    |    |    |
|--|---|----|-----|-----|----|----|----|----|----|
|  | D | -1 | 5   | -11 | 2  | 0  | -4 | 12 | -4 |
|  | E | 3  | -18 | 13  | 0  | NA | 8  | 0  | -5 |
|  | F | -2 | -7  | 0   | 6  | 0  | 3  | 3  | -3 |
|  | G | -7 | 1   | 2   | -1 | -1 | -4 | 11 | -2 |
|  | H | -8 | -3  | -2  | 0  | 0  | -2 | 23 | NA |

| B          |   | Second Pass |     |     |     |    |    |    |    |
|------------|---|-------------|-----|-----|-----|----|----|----|----|
|            |   | A           | B   | C   | D   | E  | F  | G  | H  |
| First Pass | A | -18         | 4   | -4  | -7  | 3  | 6  | 16 | 1  |
|            | B | -4          | -24 | 0   | 6   | 0  | 0  | 23 | -1 |
|            | C | -3          | 19  | -22 | -26 | 0  | 3  | 28 | 2  |
|            | D | -1          | 13  | -20 | -26 | 0  | 4  | 28 | 1  |
|            | E | 2           | -8  | -4  | 2   | NA | 8  | 2  | -2 |
|            | F | -7          | -2  | -1  | 0   | -1 | -2 | 12 | 0  |
|            | G | -2          | 4   | -2  | 3   | 0  | -3 | 2  | -3 |
|            | H | -3          | -3  | -3  | -19 | 0  | 5  | 26 | NA |

155  
156 *Note:* Greater negative values (the deeper the orange hue) indicate greater frequency of the rule  
157 sequence in the training environment. Larger positive values (the deeper the blue hue) indicate  
158 a greater frequency of the rule sequence in the competition environment. NA represents where  
159 the two rule IDs did not occur sequentially. Values closer to '0' denote closer similarities  
160 between training and competition.  
161

162 Figure 2 depicts the observed frequency of effectiveness of the third disposal following two  
163 sequential disposals across competition matches (A), match simulations (B) and SSGs (C). The  
164 variation between competition and training environments are visualised through colour hues,  
165 in addition to the observed frequency being overlaid. The third disposal in the sequence was  
166 more likely to be effective in SSGs, relative to competition matches and match simulation.  
167 Specifically, the observed frequency of the third disposal in the sequence being effective  
168 ranged from 54 to 89% for competition matches, 49 to 84% for match simulations, compared  
169 to 77 to 88% for SSGs (Fig 3). A majority of competition match third disposal effectiveness  
170 were above 70%, with only six disposal sequences less than 70% effectiveness. Comparatively,  
171 28 disposal sequences during match simulations resulted in less than 70% effectiveness (Fig  
172 2,3).

173

174

\*\*\*\* INSERT FIGURE 2 ABOUT HERE \*\*\*\*

175

176

177

\*\*\*\* INSERT FIGURE 3 ABOUT HERE \*\*\*\*

178

## 179 **Discussion**

180 The primary aim of this study was to compare constraint interactions and their

181 frequencies, between match simulations, SSGs, and competition matches in AF. Secondly, it

182 aimed to determine the extent to which they influenced disposal type and effectiveness.

183 Thirdly, this study sought to understand the sequential nature of disposals and whether disposal

184 sequences are dependent upon the preceding disposals. Accordingly, this study aimed to move

185 forward the methodology for the measurement of RLD to move beyond a single instance and

186 account for continuous nature of match events. For example, by extending the rule-based

187 approach from one disposal (10) and sought to understanding concomitantly disposal

188 sequences, and how disposals are dependent on disposal sequences. Results demonstrated that

189 the frequency and confidence of different disposal types and constraint interactions varied

190 between match and training environments. These differences varied depending on the training

191 task, with match simulations yielding a greater level of representativeness to matches relative

192 to SSGs.

193 The primary and secondary aims sought to compare constraint interactions and their

194 frequencies, between match simulations, SSGs, and competition matches, as well as determine

195 the extent to which they influenced disposal type and effectiveness. This study demonstrates

196 that an understanding of the differences between support and confidence levels of constraint

197 interactions within training and competition environments is an important consideration for the

198 design of representative training tasks. For example, match simulations generally showed  
199 greater similarity to competition matches, with respect to disposal type. However, competition  
200 matches incurred a greater frequency of pressured handballs performed within 2s (Rule G),  
201 relative to match simulations. These differences between training and competition  
202 environments could exist for a number of practical reasons. Notably, the design features of the  
203 SSGs could intentionally favour a specific disposal type (e.g. kick), whilst, in general, the  
204 training environment could incur less physical pressure relative to a competitive match, given  
205 differences in physical exertion and intensity (19). Practitioners could therefore use this  
206 information to improve the representativeness of such training tasks by constraining field  
207 dimensions within training to increase player density to lead to an increase in physical pressure  
208 imposed from an opponent (25, 26).

209         Due to the intent of the match simulations compared to SSGs, it is unsurprising to note  
210 that match simulations were more representative of competition compared to the SSGs. Thus,  
211 it is reasonable to suggest that not all training tasks will yield the same level of  
212 representativeness, potentially due to their explicit intent. For example, a practitioner may  
213 manipulate certain constraints of a SSG to facilitate greater disposal efficiency, reducing  
214 representativeness relative to competition, but still achieving the intended task goal.  
215 Conversely, a practitioner may want to challenge disposal efficiency within a SSG, by  
216 manipulating temporal and spatial constraints, so the training task is harder (with reference to  
217 time and space) than what is afforded within competition. Although it is likely that  
218 practitioners' do not plan for every training task to express near perfect representativeness, this  
219 methodology provides a platform by which 'target' areas could be identified, informing  
220 practitioners as to how frequent non-representative actions are performed within practice. Such  
221 information could better guide the macro- and meso- structures of practice, ensuring less  
222 representative training tasks are coupled with more representative tasks. Furthermore, the



223 manipulation of between activity differences align with the principles of the periodisation of  
224 skill acquisition (27), but emphasise the importance of being able to measure the influence of  
225 constraint interaction within training tasks (10). A training task classification systems may be  
226 able to aid practitioners in this process to ensure the appropriate tasks are conducted together  
227 based on its characteristics and intent (28). However, more research is required as the ideal  
228 balance of representative versus non-representative practice to gain the greatest performance  
229 benefit in competition is currently unknown.

230         The third aim sought to explore concomitantly disposal sequences. Differences between  
231 the training and competitive performance environments were found when exploring the  
232 observed frequency of a third sequential disposal being classified as ‘effective’. Understanding  
233 concomitant disposal sequences is a key feature of complexity. This is essential for RLD as it  
234 enables understanding of not just the current status, but what concomitantly interactions occur  
235 after. For matches and match simulations, the observed frequency of an effective third  
236 sequential disposal was lower compared to the SSGs. This practice task yielded the highest  
237 range of observed frequency for an effective third disposal, likely due to the task design of the  
238 SSGs, which may encourage a more continuous, effective, chain of disposal. This could have  
239 been intentionally designed within the SSGs through the systematic manipulation of player  
240 numbers (task constraint) to favour the offensive team (for example, a SSG consisting of 6 vs.  
241 4). Nonetheless, this analysis demonstrates how a chain of disposals could partially shape  
242 future disposal effectiveness. Subsequently, as a result of understanding the influence of  
243 disposals on following disposals allows a practitioner can gain further insight into the  
244 representativeness of their training environment, guiding the manipulation of constraints to  
245 increase or decrease task complexity.

246         A limitation of this study was that it grouped all SSGs together, despite it being possible  
247 that some SSGs had differing task intentions and subsequent challenge points, thus diluting

248 their representativeness. This may allow for a more complete insight into the representativeness  
249 of individual SSGs. Additionally, a limited number of constraints were used to model RLD,  
250 and thus the model presented here is a simplistic view of RLD. The sampling of appropriate  
251 constraints is an evolving process as better and new measures become available. The use of  
252 experiential coach knowledge could aid in the informed selection of constraints, however  
253 experiential knowledge is dependent on the individual, subject to biases and the environment  
254 in which it is applied. Future studies may examine the frequency of rule occurrence in a defined  
255 period of time (19). For instance, a SSG played in a small area may have a higher frequency of  
256 disposals per minute, compared to a larger area. Given the constraints sampled in the present  
257 study are discrete in nature, fuzzy approaches or similar methodologies could be used to link  
258 match events and spatiotemporal data, allowing the assessment of more constraints and insights  
259 into training representativeness.

260

## 261 **Conclusion**

262 Disposals are influenced by the interaction of constraints in training and competition  
263 environments in elite AF. Variation exists in the frequency whereby disposals occur under  
264 specific constraints across the competition matches, match simulations and SSGs. Although  
265 training and competition environments differed, greater levels of representativeness existed  
266 between match simulations and competition matches compared to SSGs and competition  
267 matches. These insights can aid the comprehension of how constraints interact to shape the  
268 emergence of specific disposals and their effectiveness, affording practitioners with a platform  
269 for the development and measurement of representative training tasks. The analytical  
270 techniques applied in the present study are not limited to AF and may assist in designing  
271 representative training tasks across other sports via the consideration of constraint interaction.

272 Importantly, this study provides a methodological advancement in the measurement of  
273 constraint influence, frequency and accounting for the continuous nature of sport.

274

275 **Disclosure Statement:** The authors report no conflict of interest

276 **References**

- 277 1. Pinder R, Davids K, Renshaw I, Araújo D. Representative learning design and  
278 functionality of research and practice in sport. *Journal of Sport and Exercise Psychology*.  
279 2011;33(1):146-55.
- 280 2. Brunswik E. Perception and the representative design of psychological experiments:  
281 Univ of California Press; 1956.
- 282 3. Newell KM. Constraints on the development of coordination. *Motor development in*  
283 *children: Aspects of coordination and control*. 1986;34:341-60.
- 284 4. Davids K, Button C, Bennett S. Dynamics of skill acquisition: A constraints-led  
285 approach: Human Kinetics; 2008.
- 286 5. Woods CT, McKeown I, Shuttleworth RJ, Davids K, Robertson S. Training programme  
287 designs in professional team sport: An ecological dynamics exemplar. *Human movement*  
288 *science*. 2019;66:318-26.
- 289 6. Robertson S, Spencer B, Back N, Farrow D. A rule induction framework for the  
290 determination of representative learning design in skilled performance. *Journal of Sport*  
291 *Science*. 2019.
- 292 7. Araújo D, Davids K. The (Sport) Performer-Environment System as the Base Unit in  
293 Explanations of Expert Performance. *Journal of Expertise/December*. 2018;1(3).
- 294 8. McLean S, Hulme A, Mooney M, Read GJM, Bedford A, Salmon PM. A systems  
295 approach to performance analysis in women's netball: Using Work Domain Analysis to model  
296 elite netball performance. *Frontiers in Psychology*. 2019;10:201.
- 297 9. Vaughan J, Mallett CJ, Davids K, Potrac P, López-Felip MA. Developing Creativity to  
298 Enhance Human Potential in Sport: A Wicked Transdisciplinary Challenge. *Frontiers in*  
299 *psychology*. 2019;10:2090.
- 300 10. Browne PR, Sweeting AJ, Davids K, Robertson S. Prevalence of interactions and  
301 influence of performance constraints on kick outcomes across Australian Football tiers:  
302 Implications for representative practice designs. *Human movement science*. 2019:621-30.
- 303 11. Handford C, Davids K, Bennett S, Button C. Skill acquisition in sport: Some applications  
304 of an evolving practice ecology. *Journal of sports sciences*. 1997;15(6):621-40.
- 305 12. Araújo D, Davids K, Bennett SJ, Button C, Chapman G. Emergence of sport skills under  
306 constraints. In: Williams AM, Hodges NJ, editors. *Skill acquisition in sport: Research, theory*  
307 *and practice*: Routledge; 2004. p. 409.
- 308 13. Pocock C, Bezodis NE, Davids K, North JS. Hot hands, cold feet? Investigating effects of  
309 interacting constraints on place kicking performance at the 2015 Rugby Union World Cup.  
310 *European journal of sport science*. 2018:1-8.
- 311 14. Ometto L, Vasconcellos FV, Cunha FA, Teoldo I, Souza CRB, Dutra MB, et al. How  
312 manipulating task constraints in small-sided and conditioned games shapes emergence of  
313 individual and collective tactical behaviours in football: A systematic review. *International*  
314 *Journal of Sports Science & Coaching*. 2018;13(6):1200-14.
- 315 15. Canton A, Torrents C, Ric A, Gonçalves B, Sampaio JE, Hristovski R. Effects of temporary  
316 numerical imbalances on collective exploratory behaviour of young and professional football  
317 players. *Frontiers in psychology*. 2019;10:1968.
- 318 16. Hristovski R, Davids K, Araújo D, Passos P. Creativity in sport and dance: ecological  
319 dynamics on a hierarchically soft-assembled perception–action landscape. *Complex systems*  
320 *in sport*: Routledge; 2013. p. 287-300.

- 321 17. Gonçalves B, Esteves P, Folgado H, Ric A, Torrents C, Sampaio J. Effects of pitch area-  
322 restrictions on tactical behavior, physical, and physiological performances in soccer large-  
323 sided games. *The Journal of Strength & Conditioning Research*. 2017;31(9):2398-408.
- 324 18. Aguiar M, Botelho G, Lago C, Maças V, Sampaio J. A review on the effects of soccer  
325 small-sided games. *Journal of human kinetics*. 2012;33:103-13.
- 326 19. Ireland D, Dawson B, Peeling P, Lester L, Heasman J, Rogalski B. Do we train how we  
327 play? Investigating skill patterns in Australian football. *Science and Medicine in Football*.  
328 2019:1-10.
- 329 20. Morgan S, editor *Detecting Spatial Trends in Hockey Using Frequent Item Sets*.  
330 *Proceedings of the 8th International Symposium on Computer Science in Sport*; 2011.
- 331 21. Hahsler M, Buchta C, Gruen B, Hornik K. Package 'arules'. 2018.
- 332 22. Browne PR, Morgan S, Bahnisch J, Robertson S. Discovering patterns of play in netball  
333 with network motifs and association rules. *International Journal of Computer Science in Sport*.  
334 2019;18(1):64-79.
- 335 23. Wickham H, Francois R, Henry L, Müller K. *dplyr: A Grammar of Data Manipulation*. R  
336 package version 0.4.3. R Found Stat Comput, Vienna [https://CRAN](https://CRAN.R-project.org/package=dplyr)  
337 [R-project org/package=](https://CRAN.R-project.org/package=dplyr)  
338 [dplyr](https://CRAN.R-project.org/package=dplyr). 2015.
- 338 24. Wickham H, Henry L. *tidyr: easily tidy data with "spread ()" and "gather ()" functions*.  
339 R package version 0.8.0. URL [https://CRAN](https://CRAN.R-project.org/package=tidyr). R-project.  
340 [org/package= tidyr](https://CRAN.R-project.org/package=tidyr) [accessed 14 May  
341 2018]; 2018.
- 341 25. Klusemann MJ, Pyne DB, Foster C, Drinkwater EJ. Optimising technical skills and  
342 physical loading in small-sided basketball games. *Journal of sports sciences*.  
343 2012;30(14):1463-71.
- 344 26. Humberto Almeida C, Paulo Ferreira A, Volossovitch A. Manipulating task constraints  
345 in small-sided soccer games: Performance analysis and practical implications. *The Open*  
346 *Sports Science Journal*. 2012;5(1).
- 347 27. Farrow D, Robertson S. Development of a skill acquisition periodisation framework for  
348 high-performance sport. *Sports Medicine*. 2017;47(6):1043-54.
- 349 28. Corbett DM, Bartlett JD, O'connor F, Back N, Torres-Ronda L, Robertson S.  
350 Development of physical and skill training drill prescription systems for elite Australian Rules  
351 football. *Science and Medicine in Football*. 2018;2(1):51-7.

353

354 **Figure Captions**

355

356 **Figure 1.** Variation in levels of support (A) and confidence (B) of each Rule ID match  
357 simulations and Small Sided Games relative to competition matches. Where zero is equal to  
358 competition matches. Positive values reflect greater values for competition matches.

359

360

361 **Figure 2.** The observed frequency of effectiveness of the third disposal following two  
362 sequential disposals across competition matches A) competition match B) match simulation C)  
363 Small Sided Games. Values expressed as percentages (%).

364 *Note:* The scale moves from orange to blue with the deeper the hue the greater observed  
365 frequency of an effective third disposal. Blank sections are those which did not have two  
366 sequential passes. Grey circles reflect those sequences of passes which did not continue to a  
367 third disposal.

368

369

370 **Figure 3.** Density plot of the observed frequency of effectiveness of the third disposal  
371 following two sequential disposals across competition matches (green), match simulations  
372 (red) and Small Sided Games (blue).

373

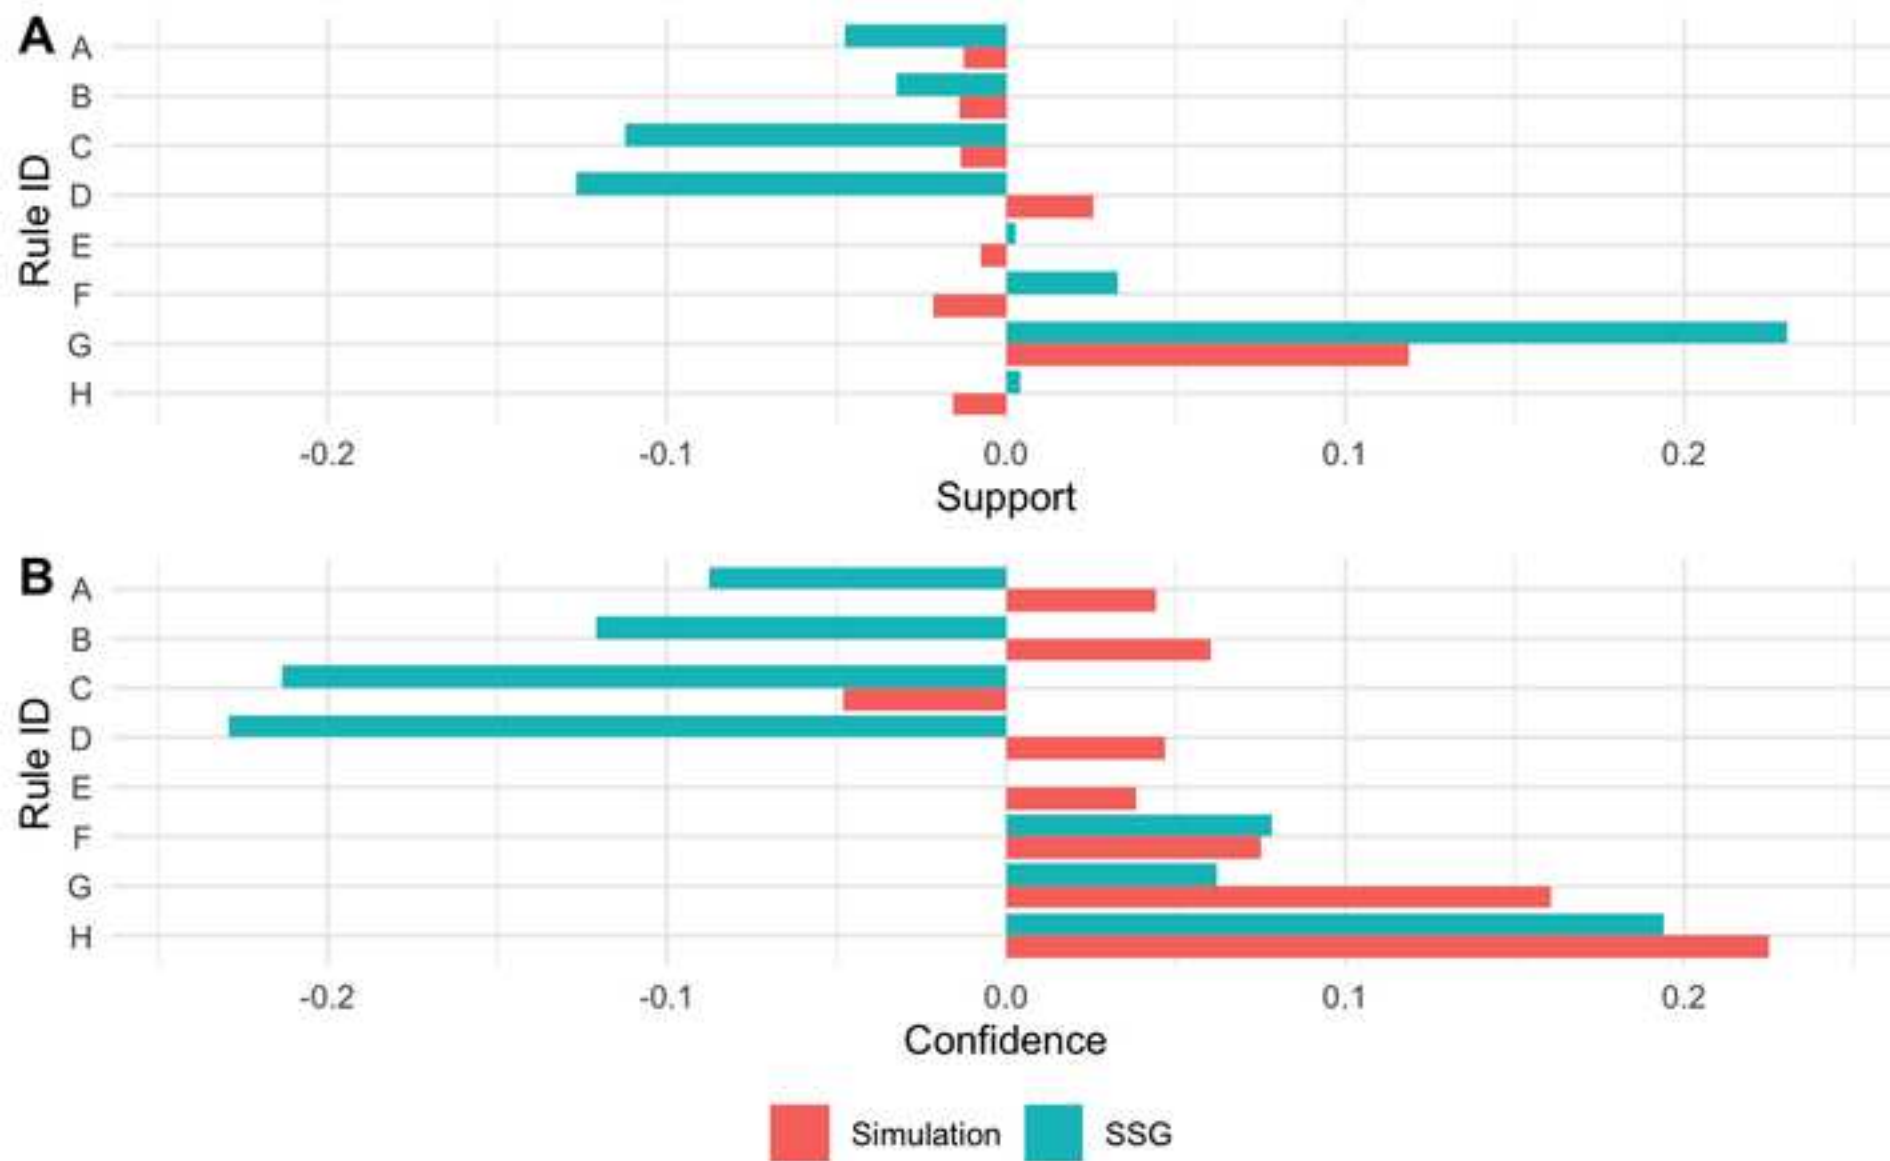

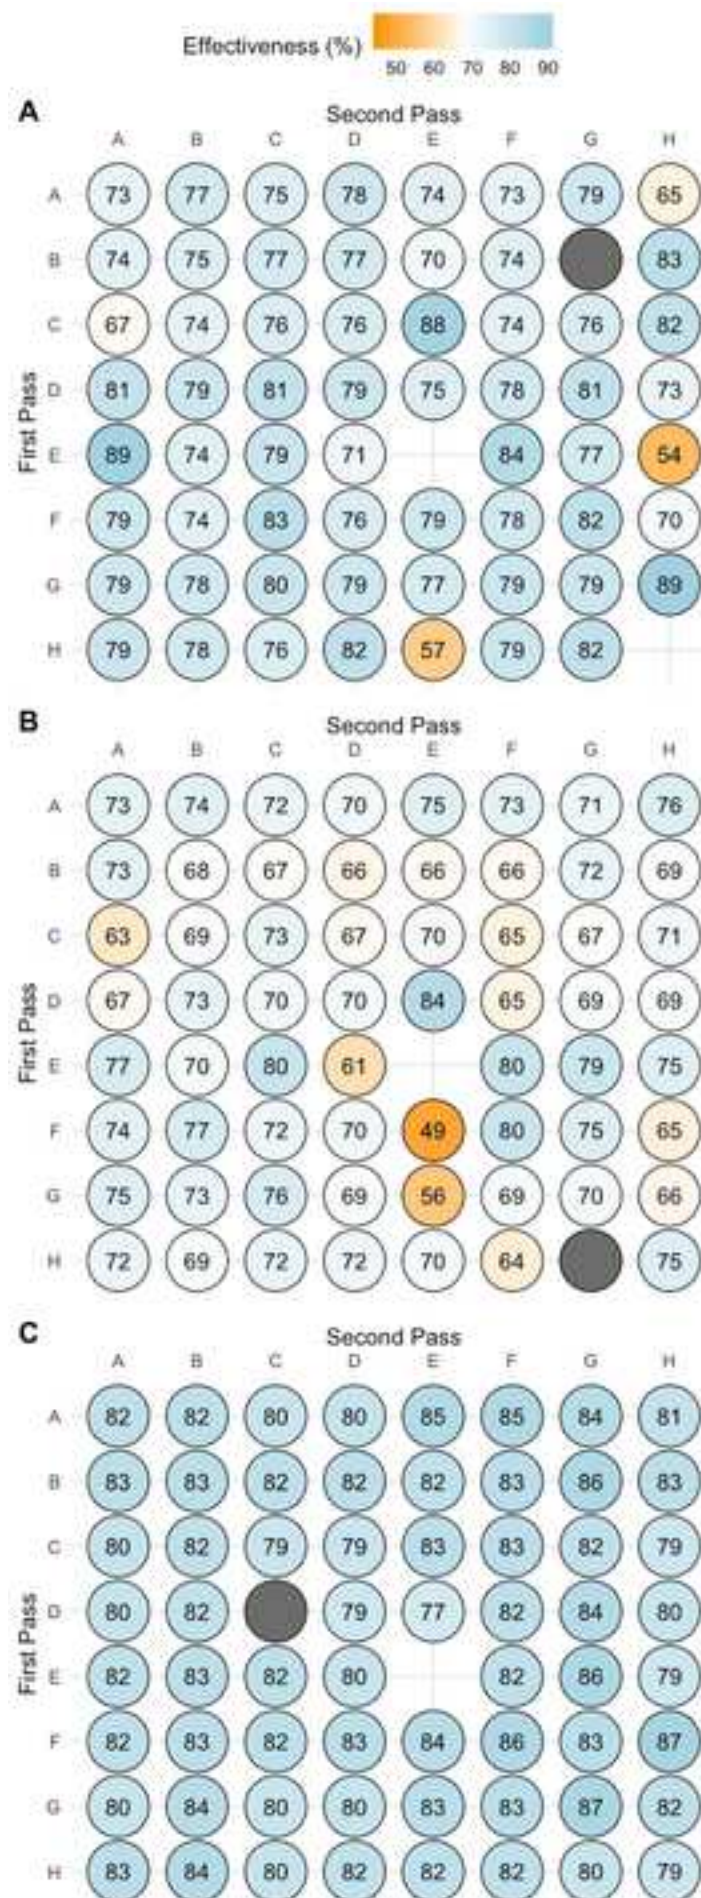



Figure 3

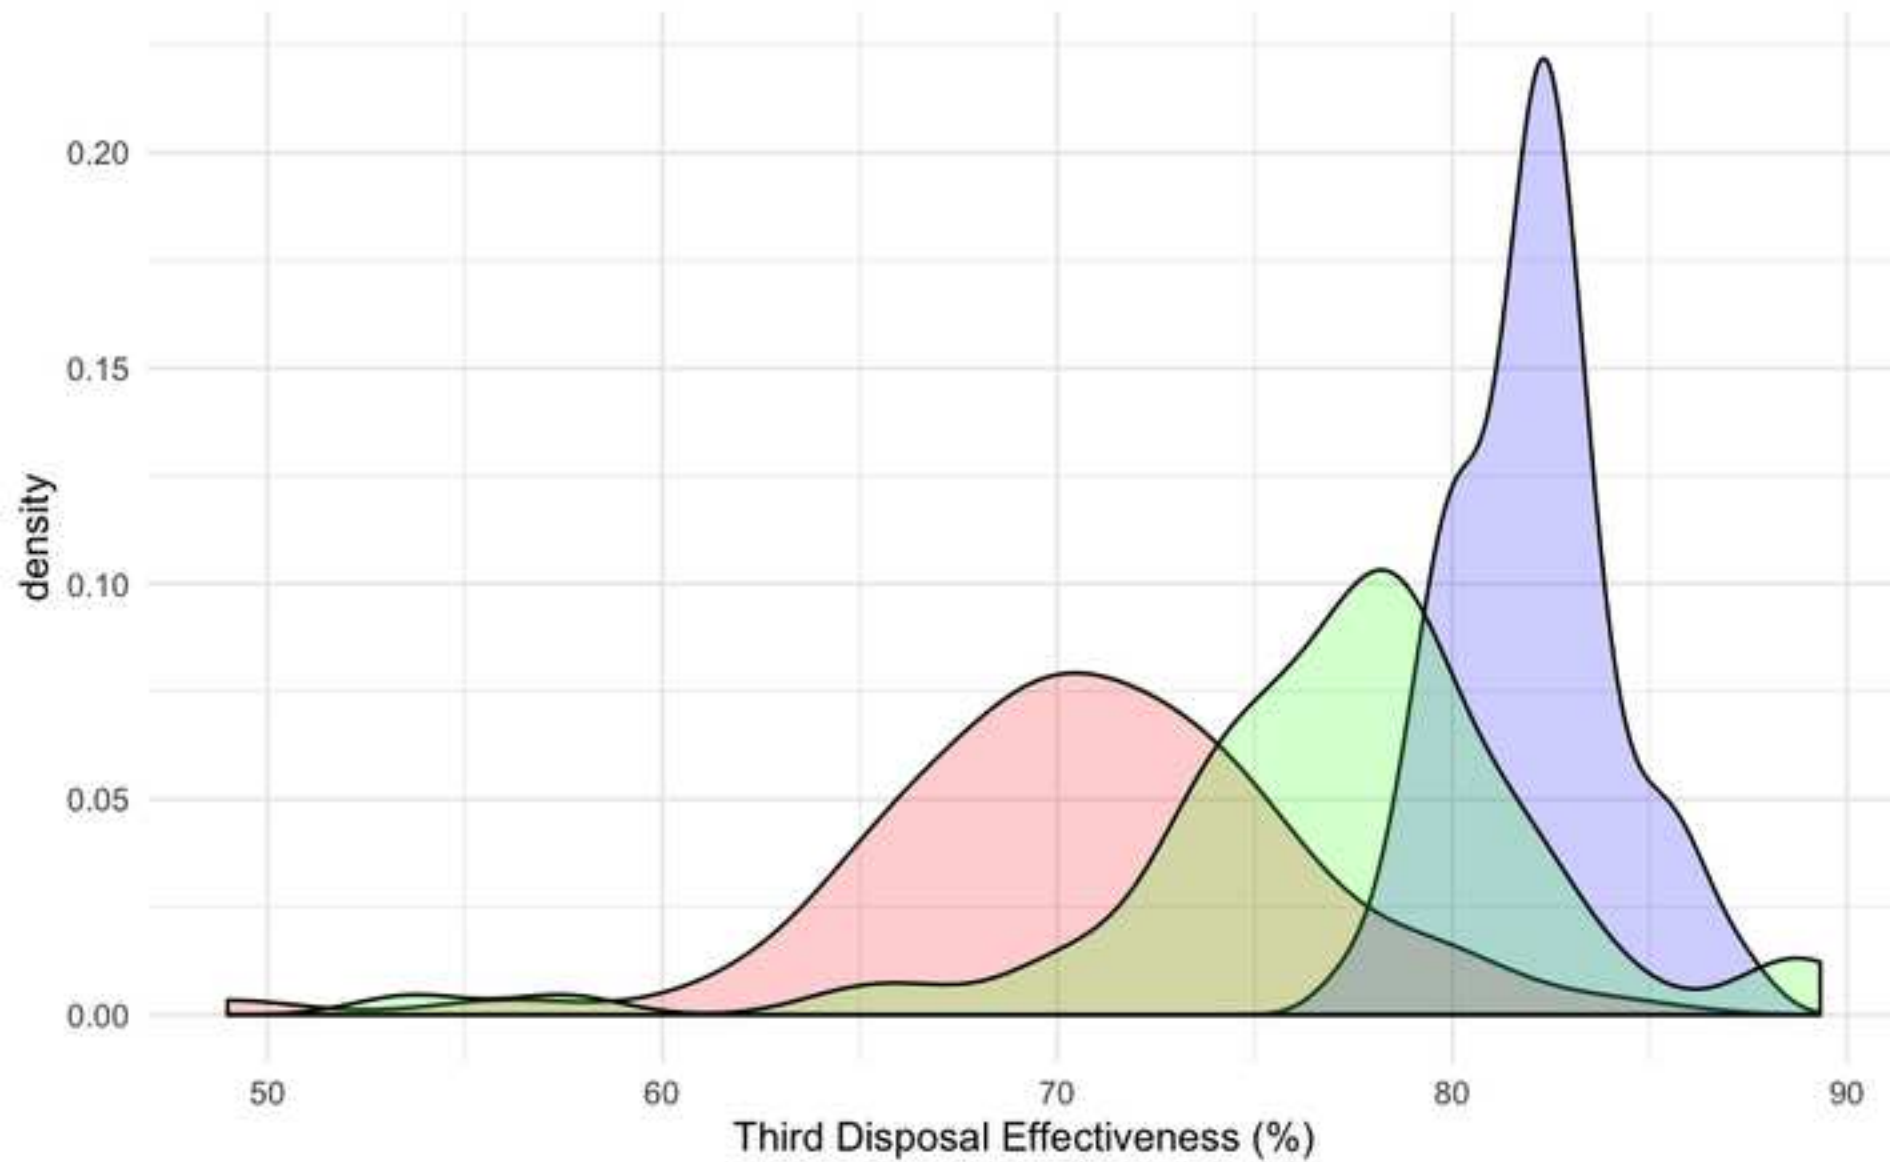



Click here to access/download  
**Supporting Information**  
Deidentified\_Data.csv



Supplement: pone.0242336.s002.pdf [file pone.0242336.s002.pdf]
